1 **Monocyte-derived transcriptome signature indicates antibody-dependent cellular**  
2 **phagocytosis as the primary mechanism of vaccine-induced protection against HIV-1**

3 Shida Shangguan<sup>1,2</sup>, Philip K. Ehrenberg<sup>1</sup>, Aviva Geretz<sup>1,2</sup>, Lauren Yum<sup>1,2</sup>, Gautam Kundu<sup>1,2</sup>,  
4 Kelly May<sup>1,2</sup>, Slim Fourati<sup>3</sup>, Krystelle Nganou-Makamdop<sup>4</sup>, LaTonya D. Williams<sup>5</sup>, Sheetal  
5 Sawant<sup>5</sup>, Eric Lewitus<sup>1,2</sup>, Punnee Pitisuttithum<sup>6</sup>, Sorachai Nitayaphan<sup>7</sup>, Suwat Chariyalertsak<sup>8</sup>,  
6 Supachai Rerks-Ngarm<sup>9</sup>, Morgane Rolland<sup>1,2</sup>, Daniel Douek<sup>4</sup>, Peter Gilbert<sup>10</sup>, Georgia D.  
7 Tomaras<sup>5</sup>, Nelson Michael<sup>1</sup>, Sandhya Vasan<sup>1,2</sup>, Rasmi Thomas<sup>1,\*</sup>

8  
9 <sup>1</sup>US Military HIV Research Program (MHRP), Walter Reed Army Institute of Research, Silver  
10 Spring, Maryland, United States, <sup>2</sup>Henry M. Jackson Foundation for the Advancement of  
11 Military Medicine, Bethesda, Maryland, United States, <sup>3</sup>Department of Pathology and  
12 Laboratory Medicine, Emory University, Atlanta, Georgia, United States, <sup>4</sup>Vaccine Research  
13 Center, NIH, Bethesda, Maryland, United States, <sup>5</sup>Departments of Surgery, Immunology and  
14 Molecular Genetics and Microbiology, Duke University School of Medicine, Durham, North  
15 Carolina, United States, <sup>6</sup>Vaccine Trial Centre, Faculty of Tropical Medicine, Mahidol  
16 University, Bangkok, Thailand, <sup>7</sup>Armed Forces Research Institute of Medical Sciences,  
17 Bangkok, Thailand, <sup>8</sup>Research Institute for Health Sciences and Faculty of Public Health, Chiang  
18 Mai University, Chiang Mai, Thailand, <sup>9</sup>Department of Disease Control, Ministry of Public  
19 Health, Nonthaburi, Thailand, <sup>10</sup>Fred Hutchinson Cancer Research Center, Seattle, Washington,  
20 United States.

21  
22 \*To whom correspondence should be addressed: Rasmi Thomas, PhD, U. S. Military HIV  
23 Research Program (MHRP), Walter Reed Army Institute of Research, 503 Robert Grant Avenue,

- 24 Rm 2W07, Silver Spring, MD, USA 20910. Email: [rthomas@hivresearch.org](mailto:rthomas@hivresearch.org); phone: 301-319-
- 25 9960; fax: 301-319-7512
- 26
- 27 Conflict of interest statement
- 28 The authors have declared that no conflict of interest exists.

29 **Abstract**

30 A gene signature previously correlated with mosaic adenovirus 26 vaccine protection in simian  
31 immunodeficiency virus (SIV) and SHIV challenge models in non-human primates (NHP). In  
32 this report we investigated presence of this signature as a correlate of reduced risk in human  
33 clinical trials and potential mechanism for protection. The absence of this gene signature in the  
34 DNA/rAd5 human vaccine trial which did not show efficacy, strengthens our hypothesis that this  
35 signature is only enriched in studies that demonstrated protection. This gene signature was  
36 enriched in the partially effective RV144 human trial that administered the ALVAC/protein  
37 vaccine, and we find that the signature associates with both decreased risk of HIV-1 acquisition  
38 and increased vaccine efficacy. Total RNA-seq in a clinical trial that used the same vaccine  
39 regimen as the RV144 HIV vaccine implicated antibody-dependent cellular phagocytosis  
40 (ADCP) as a potential mechanism of vaccine protection. CITE-seq profiling of 53 surface  
41 markers and transcriptomes of 53,777 single cells from the same trial, showed that genes in this  
42 signature were primarily expressed in cells belonging to the myeloid lineage including  
43 monocytes, which are major effector cells for ADCP. The consistent association of this  
44 transcriptome signature with vaccine efficacy represents a tool both to identify potential  
45 mechanisms, as with ADCP here, and to screen novel approaches to accelerate development of  
46 new vaccine candidates.

47

48 **Keywords**

49 HIV vaccine, vaccine efficacy, single cell, CITE-seq, transcriptomics, RNA-seq, ADCP, RV144

## 50 **Introduction**

51 HIV vaccines are being tested in ongoing HIV human efficacy trials including the HVTN 705  
52 and 706 studies (Hsu & O'Connell, 2017; Mega, 2019). Vaccines from these trials were  
53 previously tested in non-human primate (NHP) and showed partial protection from infection  
54 (Barouch et al., 2015; Barouch et al., 2018). These vaccines are based on the adenovirus serotype  
55 26 (Ad26)-based regimen and have been tested in human immunogenicity trials (Baden et al.,  
56 2020; Barouch et al., 2018). To date, the pivotal RV144 phase 3 human efficacy trial conducted  
57 in Thailand is the only vaccine to show any protection against HIV (Rerks-Ngarm et al., 2009).  
58 The vaccine used a canary-pox ALVAC-based vector with a bivalent gp120 protein boost.  
59 Although neither of the vaccine regimens using different viral vectors were fully efficacious,  
60 there is some consensus that current preventive and treatment methods along with a moderately  
61 effective vaccine could potentially reduce the HIV pandemic (Anderson, Swinton, & Garnett,  
62 1995; Andersson et al., 2007; Fauci, 2017; Medlock et al., 2017). While a number of correlates  
63 of vaccine protection have been described for these studies, protection mediated by the humoral  
64 immune system including HIV-1 specific IgG antibody titers, antibody Fc polyfunctionality,  
65 antibody interactions with HLA class II gene products and antibody effector functions have been  
66 key features of these partially effective vaccines (Barouch et al., 2015; Barouch et al., 2018;  
67 Haynes et al., 2012; Prentice et al., 2015).

68         Recently, we showed that a vaccine-induced gene signature identified in B cells by an  
69 unbiased transcriptome-wide RNA-seq approach associated with decreased risk against  
70 SIV/SHIV infection in NHP studies evaluating the Ad26 vaccine (Ehrenberg et al., 2019). This  
71 geneset was also enriched in NHP and the human RV144 trial that employed a vaccine  
72 containing the ALVAC viral vector (Ehrenberg et al., 2019). This gene signature is not merely a

73 general response elicited by vaccination as it was not enriched in the Ad26-MVA arm of the  
74 SHIV challenge in NHP that showed some protection previously (Barouch et al., 2018). This  
75 gene signature was initially defined when comparing differentially expressed genes between B  
76 cells and monocytes from vaccinated individuals in an Influenza immunogenicity trial (Nakaya  
77 et al., 2011). The geneset that was submitted to the molecular signature database (MSigdb)  
78 comprised the top 200 genes that were upregulated in monocytes compared to B cells. In our  
79 previous study, specific genes in this geneset were upregulated in the uninfected compared to  
80 infected group in multiple SIV/HIV trials (Ehrenberg et al., 2019). Genes that were previously  
81 correlated with immunogenicity in human vaccine trials of influenza and yellow fever, including  
82 TNFSF13 (APRIL), were also enriched in uninfected rhesus monkeys in the NHP studies (Li et  
83 al., 2014; Nakaya et al., 2011). Although we first identified this geneset in sorted B cells  
84 (Ehrenberg et al., 2019), we were able to identify the same signature associating with reduced  
85 infection in published microarray datasets from both bulk unstimulated and *in vitro* antigen-  
86 stimulated PBMCs from three independent preclinical and clinical studies (Fourati et al., 2019;  
87 Vaccari et al., 2018; Vaccari et al., 2016). To determine if specific immune responses might be  
88 driving protection in conjunction with the gene signature, we examined whether this geneset  
89 associated with these responses measured in the NHP studies. We observed that this gene  
90 signature was also enriched in animals with increased magnitude of ADCP (Ehrenberg et al.,  
91 2019). We propose that this gene signature is a correlate of reduced risk of infection in efficacy  
92 studies and further investigation of the enriched genes in the geneset could potentially help  
93 uncover the mechanism of vaccine protection. Here we investigate this gene signature further as  
94 a proxy of vaccine-induced protection in human clinical trials, to identify the cellular origin, as  
95 well as to investigate potential mechanisms for the decreased risk of infection.

96

## 97 **Results**

### 98 **Gene signature is absent in a human HIV vaccine trial that did not show efficacy**

99 Since the gene signature associated with vaccine protection in multiple studies using different  
100 regimens, we wanted to further confirm that this signature was truly associated with protection  
101 by looking for its presence (or absence) in a human vaccine trial that failed to show efficacy. We  
102 screened for this gene signature in whole-transcriptome data from participants vaccinated with  
103 the DNA/rAd5 HIV-1 preventive vaccine in the HVTN 505 human efficacy trial. Immunizations  
104 in this trial were halted prior to reaching the clinical endpoint due to lack of efficacy (Hammer et  
105 al., 2013). When comparing infection status, enrichment of this gene signature, as defined by the  
106 normalized enrichment score (NES), was not significant in transcriptome data from sorted B  
107 cells or monocytes one month after the final immunization in the vaccinated arm of the study  
108 (NES=-1.18, P=0.09 and NES=1.12, P=0.18 respectively). This finding further supports our  
109 hypothesis that this gene signature is associated with protection as summarized in Table 1.

110

### 111 **GES is the strongest correlate of protection in RV144**

112 In previous analyses of NHP preclinical studies, we utilized a composite gene expression  
113 score (GES) consisting of an average of standardized expression of the specific number of  
114 enriched genes in one study, to predict infection status in an independent study using the  
115 overlapping expressed genes from the first study (Ehrenberg et al., 2019). While this method is  
116 successful in evaluating gene signatures in studies using similar vaccine strategies, we wanted to  
117 explore this approach across different studies using diverse platforms. For each independent  
118 study, we computed a GES derived from genes within the geneset that were enriched in  
119 uninfected donors by averaging standardized expression and showed that it associates with

120 decreased HIV-1 infection (Fig. 1). The magnitude of the GES and total number of enriched  
121 genes present in the gene signature is specific to each study and is higher in the uninfected  
122 animals in the two NHP preclinical trials evaluating the mosaic Ad26 vaccine (09-11 and 13-19),  
123 including the different arms of the 13-19 study (13-19a-b) (Fig. 1A-C). Further, in the RV144  
124 trial, the GES of 63 enriched genes in the gene signature also was higher in the vaccinated  
125 individuals that remained uninfected (Fig. 1D). The number of enriched genes in each study  
126 might vary due to global differences in the vaccine strategies, but we consistently observed that  
127 higher GES associated with protection from HIV acquisition. We took advantage of the  
128 composite GES measurement to compare it with the other known primary correlates of HIV-1  
129 infection risk in the human RV144 trial. IgG antibodies binding to the variable regions 1-2  
130 (V1V2) of the HIV-1 Envelope (Env) have been shown to correlate with decreased risk of  
131 infection, while IgA binding to Env associated with increased risk of infection (Haynes et al.,  
132 2012). We show that the association of the GES in RV144 is a stronger correlate of reduced risk  
133 of infection than the previously described V1V2-specific IgG antibodies (Fig. 2A). Cumulative  
134 incidence curves of HIV-1 infection showed decreased rates of infection among vaccine  
135 recipients with high GES (Fig. 2B) Estimated vaccine efficacy was higher among vaccine  
136 recipients with higher GES (Fig. 2C). The distribution of area under the receiver operating  
137 characteristic curve (AUC) and accuracy suggested that GES was also able to predict HIV-1  
138 infection (Fig. 2D). The effect of GES was also tested in RV144 vaccine and placebo  
139 participants who became infected during the trial (Rolland et al., 2012). If the GES was  
140 associated with vaccine efficacy, we would expect that vaccinees with a high GES did not get  
141 infected, hence vaccinees who became infected should have lower GES than placebo participants  
142 (who reflect the entire distribution of GES). This was observed across 43 breakthrough

143 participants, with a significant difference among participants infected with single HIV-1 founder  
144 variants (N=29) (Supplementary Fig. 1). These findings strengthen the hypothesis that the GES  
145 is associated with vaccine efficacy.

146

### 147 **Gene signature associates with an antibody effector function in a human vaccine trial**

148 Immune responses correlating with this signature can provide additional insights into  
149 mechanisms that could be harnessed to improve vaccine design. We previously showed in the  
150 NHP studies that the protective gene signature that was enriched in uninfected monkeys after  
151 Ad26/gp140 vaccination also associated with higher magnitude of ADCP (Ehrenberg et al.,  
152 2019). In the RV144 human trial a number of immunological parameters were previously  
153 measured as part of the immune-correlates analysis, but not ADCP. The RV306 immunogenicity  
154 trial that employed a similar prime boost RV144 vaccine regimen with additional late boosts  
155 provided us with a unique opportunity to test if the gene signature was associated with ADCP  
156 (Pitisuttithum et al., 2020). We generated transcriptome-wide gene expression data from  
157 peripheral blood two weeks after the RV144 vaccine regimen (prior to the additional boosts) and  
158 assessed for enrichment of the gene signature with the magnitude of ADCP measured at the same  
159 timepoint in 24 participants. The gene signature with 118 enriched genes was significantly  
160 associated with higher magnitude of ADCP (NES=3.0,  $P<0.001$ )(Fig. 3A). Using the same  
161 geneset, 93 genes were found to be enriched in a subset of overlapping participants (N=21),  
162 where samples were collected 3 days after the RV144 immunizations (NES=2.5,  $P<0.001$ )(Fig.  
163 3B). A GES from the list of enriched genes associating with ADCP from both timepoints was  
164 computed in the RV144 dataset. ADCP GES from both timepoints correlated strongly with the  
165 protective RV144 GES ( $\rho=0.74$ ,  $P= 2.2e-16$ ,  $\rho=0.75$ ,  $P= 2.2e-16$ )(Fig. 3C).



166

### 167 **Pathways are shared between ADCP and vaccine protection phenotypes**

168 These findings demonstrated a strong link of the geneset with both vaccine protection and ADCP  
169 in NHP and human studies. We sought to broaden our understanding of the relationship between  
170 the different enriched genes in the geneset and establish some of the top pathways with gene  
171 membership from the different studies. Genes that were significantly enriched with either the  
172 ADCP or infection phenotypes from the 09-11, 13-19, RV144, and RV306 studies  
173 (Supplementary table 1) were classified into statistically significant terms from different  
174 biological pathways and represented as networks. The top significant pathways were leukocyte  
175 activation involved in immune responses, lysosome function and signaling by interleukins (Fig.  
176 4A-B). Gene ontology of the 63 genes in the RV144 signature revealed that the top non-  
177 redundant enriched clusters with gene membership were myeloid leukocyte activation, lysosome  
178 and cellular response to oxidative stress genes (Fig. 4C).

179

### 180 **Cellular origin of the protective genes by single cell transcriptomics**

181 To dissect the cellular origin of these genes we performed simultaneous detection of mRNA and  
182 cell surface expression from single cells using the cellular indexing of transcriptomes and  
183 epitopes by sequencing (CITE-seq) technology in a subset of the vaccinated RV306 participants  
184 (Fig. 5A). This technology allows simultaneous detection of cell surface markers and gene  
185 expression from the same single cells. Our analysis revealed that a majority of the genes in the  
186 RV144 signature were expressed in cells of the myeloid lineage, with monocyte subsets having  
187 the highest average gene expression (Fig. 5B). A subset of genes were also significantly  
188 associated with decreased risk of acquisition in a univariate analysis (Odds ratio<1.0, P<0.05,

189  $q < 0.1$ ) (Fig. 5C). A stepwise logistic regression analysis identified specific genes (SEMA4A,  
190 SLC36A1, SERINC5, IL17RA, CTSD, CD68, GAA) to have independent associations with  
191 reduced risk of acquisition and were mainly expressed in the monocyte compartment (Fig. 5D).  
192 CD14 monocytes also had the greatest number of differentially expressed genes that were  
193 associated with ADCP (Fig. 5E).

194

## 195 **Discussion**

196 Though an effective vaccine has been a challenge for the HIV field, we see a glimpse of  
197 optimism in partially protective NHP and human studies (Barouch et al., 2015; Barouch et al.,  
198 2013; Barouch et al., 2018; Rerks-Ngarm et al., 2009; Vaccari et al., 2018; Vaccari et al., 2016).  
199 These studies provide a unique opportunity to identify correlates of reduced risk that could help  
200 inform protective signals and enable design of enhanced vaccine strategies. Targeted and  
201 unbiased approaches have implicated non-neutralizing antibodies as the major correlate of  
202 reduced risk of HIV infection (Barouch et al., 2015; Barouch et al., 2013; Barouch et al., 2018;  
203 Haynes et al., 2012; Vaccari et al., 2018; Vaccari et al., 2016). We previously showed that a  
204 transcriptomic signature first identified in sorted B cells at timepoints prior to challenge was a  
205 correlate of protection in two NHP studies after administration of the Ad26/gp140 vaccine. This  
206 signature also associated with increased magnitude of ADCP in the vaccinated monkeys  
207 (Ehrenberg et al., 2019). We also identified this signature in bulk PBMCs from other studies that  
208 used the ALVAC/protein regimen, suggesting that this vaccine might be an indicator of effective  
209 vaccination. In this report we further investigated this gene signature to answer the following  
210 questions including: 1) can the gene signature's association with protection be substantiated in

211 additional human efficacy trials, 2) does it associate with ADCP in human trials, and 3) what is  
212 the cellular origin of the signature at the single cell level?

213         The gene signature previously associated with HIV vaccine protection in a number of  
214 studies with partial protection (Ehrenberg et al., 2019). We hypothesized that if this gene set was  
215 a true marker of HIV vaccine protection, it would not be enriched in a failed vaccine trial. HVTN  
216 505 is a DNA based vaccine which despite not showing overall efficacy in a Phase 2b trial,  
217 demonstrated both cellular and antibody effector mediated protection in specific subgroups of  
218 individuals in follow-up studies (Fong et al., 2018; Janes et al., 2017; Neidich et al., 2019). We  
219 performed transcriptomics on sorted cell subsets from HVTN 505 vaccinated individuals and did  
220 not observe enrichment of the gene signature, further strengthening our notion that the geneset  
221 could be a proxy for vaccine protection.

222 Next, we developed a method to assess this gene signature compared to other correlates of risk in  
223 the human RV144 study. This method employs an analytical method using a GES which is  
224 computational score generated from the average expression of all genes enriched in the signature  
225 and associating with a phenotype. This method was tested across different NHP studies and  
226 RV144 and showed consistent association with reduced risk of infection based on the study  
227 specific GES. The composite GES computed from RV144 consisting of the standardized  
228 expression of 63 genes had the strongest association with decreased risk of infection and  
229 increased efficacy. The RV144 GES was also able to accurately predict infection status in the  
230 study. This study shows that the GES composite score provides a robust analytical measurement  
231 to explore the effect of genes as a continuous variable in immune-correlates analyses, and that it  
232 could be applied to other ongoing efficacy studies. Further, the analysis of RV144 breakthrough  
233 infections were consistent with GES being lower in the vaccinated infected participants

234 compared to placebos and hence protective. These observations albeit only significant in the  
235 group infected with single founder viruses, strengthen the premise of the RV144 GES being a  
236 correlate of reduced risk of infection.

237 We previously showed in NHP challenge studies that the gene signature correlated with  
238 increased magnitude of functional antibody responses (Ehrenberg et al., 2019). Although this  
239 geneset associated with ADCP in in NHP, the same analyses were previously not possible in the  
240 human RV144 study since this immune response was not reported (Haynes et al., 2012). ADCP  
241 has since been implicated with vaccine protection in a number of NHP challenge studies  
242 (Ackerman et al., 2018; Barouch et al., 2015; Barouch et al., 2013; Barouch et al., 2018; Bradley  
243 et al., 2017; Neidich et al., 2019). It is reported that ADCP could be involved in most studies that  
244 previously showed antibody-dependent correlates of protection against viruses (Tay, Wiehe, &  
245 Pollara, 2019). To investigate the effect of the gene signature on the magnitude of ADCP, we  
246 performed transcriptomics in samples from a human trial (RV306) that employed the same  
247 RV144 regimen. At both day 3 and two weeks after the 4<sup>th</sup> vaccine corresponding to the last  
248 RV144 vaccine dose, this signature correlated with increased magnitude of ADCP responses. A  
249 strong correlation was also observed between GES from the ADCP enriched genes and the  
250 vaccine protection genes in RV144. These findings provide evidence supporting the antibody-  
251 mediated effector function as the mechanistic basis of this signature.

252 The enriched genes from ADCP and infection risk in multiple studies of both NHP and  
253 human were involved in overlapping functions related to leukocyte activation, lysosomal  
254 degradation and immune stimulation by cytokines. The 63 genes from the RV144 signature were  
255 mostly clustered in the myeloid leukocyte activation pathway, alluding to the cellular origin of  
256 this signature. The specific genes in the gene set that associated with the greatest odds of reduced

257 risk of infection including SEMA4A, CTSD, CD68 and GAA were all members of this pathway,  
258 but not TNFSF13 (APRIL) which was the most protective gene in the NHP studies. Although the  
259 geneset of interest was first seen in sorted B cells from vaccinated NHP, it was subsequently  
260 identified in transcriptomic data from PBMCs in the RV144 study (Ehrenberg et al., 2019).  
261 While samples were exhausted from the RV144 primary dataset, the RV306 clinical trial that  
262 employed the same ALVAC-protein vaccine regimen gave us a unique chance to explore the  
263 cellular origin of the RV144 signature using single cell transcriptomics. Single cell surface  
264 expression data revealed that the majority of genes were expressed in monocytes, which was not  
265 surprising given the fact that this geneset was originally defined as genes downregulated in B  
266 cells compared to monocytes after influenza vaccination (Nakaya et al., 2011). While our initial  
267 study found this signature in sorted B cells from the NHP challenge studies, single cell data  
268 provides further insight that monocytes could be the cellular origin of these genes in the RV144  
269 study. Although monocytes were classified as mononuclear phagocytes almost fifty years ago,  
270 assays designed to specifically measure monocyte ADCP were not widely used in the context of  
271 vaccination until a few years ago (van Furth et al., 1972). Although monocytes have recently  
272 been implicated in vaccine-induced protection in preclinical vaccine trials of SIV challenge, our  
273 findings in human trials at the single cell level provides greater impetus to explore the role of  
274 other non-lymphoid cell populations on HIV-1 vaccine efficacy. (Gorini et al., 2020; Vaccari et  
275 al., 2018). Though we think that monocytes are important in the vaccine responses observed in  
276 RV144, it would be remiss not to mention that the effect of granulocytes including neutrophils in  
277 response to vaccination is missed when transcriptomics is performed in PBMC compared to  
278 blood. Other than the phagocytic cell, both antibody and Fc receptor diversity can influence  
279 ADCP mediated immune responses to viral pathogens and are also elements that warrant further

280 study and may potentially be manipulated to improve vaccine efficacy (Chung & Alter, 2017;  
281 Geraghty, Thorball, Fellay, & Thomas, 2019; Tay, Wiehe, et al., 2019).

282 Our data demonstrate the potential to discover novel protective correlates using an  
283 approach that mines transcriptomic data in multiple preclinical and clinical trials. Unbiased  
284 transcriptome-wide analyses are able to identify biological perturbations that associate with  
285 vaccine protection even when differences are small, but credibility can only be strengthened by  
286 replicating findings across multiple studies. Gene signatures that associate not only with vaccine  
287 protection, but specific immune responses can be a prospective tool to evaluate vaccine  
288 effectiveness even prior to challenge or infection. Developing analytical tools that can interface  
289 with phenotypes such as vaccine protection across human and preclinical studies can allow for  
290 more systematic meta-analyses of data emerging from the ongoing HIV vaccine clinical trials, as  
291 well as the recently halted HVTN 702 trial (NIH, 2020). We propose that assessment of such  
292 gene signatures with immune responses in human immunogenicity trials could provide  
293 orthogonal insight for down-selection of vaccine candidates. Identifying overlapping correlates  
294 of protection in these studies could be pivotal to making discoveries that may allow for licensure  
295 and subsequent bridging studies of an effective HIV vaccine.

296

## 297 **Methods**

### 298 **Study design**

299 The aim of the study was post-hoc analyses of a protective gene expression signature identified  
300 previously in five SIV/HIV vaccine studies with efficacy and immune response data (Ehrenberg  
301 et al., 2019). To enable interpretation of this gene signature, bulk RNA-seq, scRNA-seq and  
302 functional data was generated in clinical samples from the RV306 and HVTN 505 human trials.

303 The RV306 vaccine trial was conducted in Thailand and all participants received the primary  
304 RV144 ALVAC/gp120 vaccine series, with additional late boosts assigned to specific groups  
305 (Pitisuttithum et al., 2020). Bulk RNA-seq was performed in 24 participants two weeks after the  
306 RV144 vaccine regimen (week 26). Additionally, RNA-seq was also performed 3 days after the  
307 same primary endpoint. The HVTN 505 trial used a DNA/rAd5 vaccine regimen to test safety  
308 and efficacy in a US population (Hammer et al., 2013). PBMC collected one month after the  
309 final immunization (month 7) was available from 47 vaccinees in the HVTN 505 study for RNA-  
310 seq (Hammer et al., 2013). The infection status of the vaccinees (22 cases and 25 controls) was  
311 categorized based on infection status between months 7-24. Microarray transcriptome data from  
312 PBMCs and immune response data for 170 vaccinated individuals from the RV144 study at  
313 timepoint two weeks post last vaccination was used for correlates analyses (Fourati et al., 2019;  
314 Haynes et al., 2012). All studies were approved by the participating local and international  
315 institution review boards. Informed consent was obtained from all participants in the different  
316 trials included in this study (Hammer et al., 2013; Pitisuttithum et al., 2020).

317

### 318 **Bulk transcriptomics**

319 RNA was extracted from sorted B cells (Aqua live/dead<sup>-</sup>CD20<sup>+</sup>CD3<sup>-</sup>) and monocytes (Aqua  
320 live/dead<sup>-</sup>CD20<sup>-</sup>CD3<sup>-</sup>CD56<sup>-</sup>HLA-DR<sup>+</sup>CD14<sup>+</sup> from PBMC of HVTN 505 vaccinees using  
321 RNazolRT (MRC Inc.) as per recommendations from the manufacturer. For the preparation of  
322 mRNA libraries, polyadenylated transcripts were purified on oligo-dT magnetic beads,  
323 fragmented, reverse transcribed using random hexamers and incorporated into barcoded cDNA  
324 libraries based on the Illumina TruSeq platform. Next, libraries were validated by  
325 electrophoresis, quantified, pooled and clustered on Illumina TruSeq v2 flow cells. Clustered

326 flow cells were sequenced on an Illumina HiSeq (2000/4000) using 2 x 75 base paired-end runs.  
327 Total RNA from RV306 participants was extracted from whole blood collected in PAXgene  
328 Blood RNA tubes, using the PAXgene Blood RNA kits (both Qiagen; Germantown, MD) and  
329 subsequently subjected to the GlobinClear kit (ThermoFisher Scientific; Waltham, MA) per  
330 manufacturer's suggestions. NGS RNA-seq was performed using the SMART-Seq technology  
331 (Picelli et al., 2014; Ramskold et al., 2012). Briefly, cDNA was generated from 10 ng of RNA  
332 using the SMART-Seq v4 UltraLow Input RNA Prep kit (Takara Bio Inc) per manufacturer's  
333 suggestions, with control RNA spiked-in (ThermoFisher Scientific). Sequencing libraries were  
334 generated using the Nextera XT DNA Sample Prep kit (Illumina, San Diego, CA). Concentration  
335 of each sample in the pooled libraries were determined using the paired-end 300-cycle MiSeq  
336 Reagent Nano Kit v2 (2 x 150 bp) on a MiSeq instrument (both Illumina). NGS was performed  
337 on a final adjusted library pool using the paired-end 300-cycle NovaSeq 6000 S2 XP Reagent Kit  
338 (2 x 150 bp) on a NovaSeq instrument (both Illumina) per the manufacturer's instructions. Fastp  
339 v0.19.7 and Trimmomatic v0.33 with default parameters was used to trim low-quality bases from  
340 both ends of each read. Trimmed reads were aligned to the human genome (GRCh38 build 88-  
341 92) using HISAT2 v2.1.0 or the STAR aligner (v2.4.2a) and HTSeq (v0.6.1-0.9.1) was used for  
342 counting. Trimmed mean of M-values normalization method, as implemented in the R package  
343 edgeR, was used for normalization.

344

### 345 **Single cell transcriptomics**

346 Simultaneous evaluation of mRNA and cell surface expression from single cells was performed  
347 using feature barcoding technology from 10x Genomics, based on the CITE-seq technology  
348 (Stoeckius et al., 2017) . Cell hashing (HTO) was used in conjunction with the 10x Genomics



349 5'V(D)J Feature Barcoding kit to generate single cell mRNA (GEX) and antibody-derived tag  
350 (ADT) libraries (Stoeckius et al., 2017; Stoeckius et al., 2018). Briefly, PBMCs from 12 samples  
351 were hashed using TotalSeq-C anti-human Hashtag antibodies and combined into two batches. In  
352 each batch, surface proteins were stained with a cocktail of 53 TotalSeq-C antibodies  
353 (Biolegend). Antibody concentrations were either predetermined by titration (Kotliarov et al.,  
354 2020) or used at a default concentration. 50,000 cells from each batch were loaded onto each of 4  
355 wells of a Chromium Chip, and GEX and ADT (HTO and Feature Barcode (FB)) libraries were  
356 constructed following the manufacturer's protocol. Libraries were pooled and quantitated using a  
357 MiSeq Nano v2 reagent cartridge. Final libraries were sequenced on the NovaSeq 6000, S4  
358 reagent cartridge (2x100 bp) (Illumina).

359

#### 360 **CITE-seq data analyses**

361 FASTQ files were demultiplexed with bcl2fastq v2.20 (Illumina). Alignment and counting were  
362 performed using Cell Ranger v3.1.0 (10x Genomics) and the human reference files provided by  
363 10x Genomics (human genome GRCh38 and Ensembl annotation v93). The average number of  
364 genes per cell was 1453 and the average number of unique molecular identifiers (UMI) was  
365 4248. The mean read depth per cell was approximately 65,000–84,000. The minimum fraction of  
366 reads mapped to the genome was 88% and sequencing saturation was above 85% for all lanes  
367 with an average of 88%. The computational analysis of ADT data was performed using the  
368 Seurat v3.1 package (Stuart et al., 2019). HTO expression matrices were CLR (Centered Log-  
369 Ratio) normalized and demultiplexed using MULTIseqDemux. The FB matrices from the Seurat  
370 objects were split into cell-positive and negative droplet matrices using the HTO demultiplexing  
371 results, and were used for denoising by DSB (Denoised and Scaled by Background)

372 normalization (Kotliarov et al., 2020)(<https://cran.r-project.org/web/packages/dsb/index.html>).

373 Only cells with <10% mitochondrial genes were retained, and cells were assigned to specific

374 donors using the HTO demultiplexing results. A total of 53,777 single cells remained after the

375 quality control process. The gene expression matrices for all samples were normalized and

376 integrated into a single object in Seurat (Stuart et al., 2019). Based on the workflow described in

377 Kotliarov et al., a distance matrix was generated from cell surface protein features (Kotliarov et

378 al., 2020). This matrix was used for shared-nearest-neighbor finding and clustering at

379 resolution=0.5. Neighbor finding and clustering were performed on the integrated gene

380 expression data at a resolution=0.75 and dimensions=1:30. A tSNE (t-distributed stochastic

381 neighbour embedding) was generated from the protein data PCA. Seurat was used to generate a

382 heatmap, dotplot and featureplots. Differential gene expression testing was performed within

383 each cluster between the high and low ADCP groups using Seurat's FindMarkers function.

384 ADCP DEG were filtered to genes with >10% expression in either group, a log fold change

385 value > 0.25, and a Bonferroni p value < 0.05.

386

### 387 **ADCP assay**

388 The antibody effector function ADCP was measured as previously described (Ackerman et al.,

389 2011; Tay, Kunz, et al., 2019; Tay et al., 2016). Briefly, A244 gp120 Env-coated fluorescent

390 beads were incubated at 37°C for 2 hours with diluted plasma (1:50) collected at week 26, two

391 weeks after administration of the RV144 vaccination series. Anti-CD4 monoclonal antibody-

392 treated THP-1 cells (human monocytic cell line; ATCC TIB-201) (treated for 15 minutes at 4°C)

393 were added to immune complexes and spinoculated for 1 hour at 4°C to allow phagocytosis to

394 occur. Supernatant was removed, cells were washed and fixed in

395 paraformaldehyde. Phagocytosis was measured by flow cytometry and a phagocytosis score was  
396 calculated as follows:  $\text{phagocytosis score} = (\% \text{ pos} * \text{MFI of Sample}) / (\% \text{ pos} * \text{MFI of no-}$   
397  $\text{antibody PBS control})$ . The CD4 binding-site broadly neutralizing antibody (bnAb), CH31, was  
398 used as a positive control, and the influenza receptor binding site-specific bnAb, CH65, was used  
399 as a negative control. Results are representative of two independent experiments.

400

#### 401 **Pathway analyses**

402 Association of the protective gene signature with infection (HVTN 505) or magnitude of median  
403 ADCP (RV306) responses were analyzed using the Gene Set Enrichment Analysis (GSEA)  
404 method as described previously (Ehrenberg et al., 2019; Subramanian et al., 2005). GSEA was  
405 performed on vaccinated HVTN 505 participants at the visit 7 timepoint, one month after the last  
406 immunization. RNA-seq was performed on samples prior to infection, but participants were  
407 categorized based on their infection status. GSEA was performed on 45 RV306 RNA-seq  
408 samples that also had ADCP scores obtained at the week 26 (week 2 after the 4<sup>th</sup> vaccination)  
409 time-point. Participants were categorized into high and low ADCP groups based on the median  
410 values of ADCP measured in a total 79 vaccinated participants. The RNA-seq gene expression  
411 values at the day 3 and week 2 time-points were then analyzed for gene enrichment using a gene  
412 set of 200 genes, obtained from the Broad Institute  
413 (GSE29618\_BCELL\_VS\_MONOCYTE\_DAY7\_FLU\_VACCINE\_DN), between the two  
414 groups of samples based on the classification, in each time-point. The gene signature of interest  
415 was considered significantly enriched using a threshold of  $\text{NES} \geq 1.4$  and  $\text{P} < 0.001$  as described  
416 previously (Ehrenberg et al., 2019). Gene ontology and network analyses of genes were  
417 performed using Metascape with default parameters (Zhou et al., 2019).

## 418 **Correlates of protection**

419 Composite gene expression score (GES) was computed as the average of standardized expression  
420 of normalized enriched genes in the gene signature in different vaccine studies. The samples in  
421 each vaccine study were grouped into outcomes after challenge or infection status after  
422 immunization (Barouch et al., 2015; Barouch et al., 2018; Rerks-Ngarm et al., 2009). Logistic  
423 regression was used for evaluating the association between GES and HIV-1 infection in the  
424 RV144 study. The fitting methods accommodate the 2-phase sampling design via maximum  
425 likelihood estimation (Breslow & Holubkov, 1997). Cumulative HIV-1 incidence curves were  
426 plotted for the three subgroups of vaccine recipients defined by tertiles into the lower, middle,  
427 and upper third of the GES (Low, Medium, High subgroups), as well as for the entire placebo  
428 group HIV negative at week 24 (n=6267 subjects) for reference. These curves were estimated  
429 using the Kaplan-Meier method with inverse probability weighting that accounted for the  
430 sampling design. Next, vaccine efficacy (VE) for the GES subgroups versus the entire placebo  
431 group was estimated as one minus the odds of infection in vaccine recipients with  
432 Low/Medium/High response divided by the odds of infection in the entire placebo group HIV-1  
433 negative at week 24 of enrollment in the study. The RV144 prediction analysis was implemented  
434 by logistic regression. The dataset was randomly split into training and testing sets in a 7:3 ratio,  
435 while retaining class distributions within the groups. The training dataset consisted of 119  
436 individuals while the test dataset consisted of 51 individuals. A logistic regression of GES was fit  
437 on to the training dataset (Prentice et al., 2015). The model's discriminative ability was evaluated  
438 by generating a receiver operator characteristic curve (ROC) and the corresponding AUC on the  
439 test dataset. The prediction accuracy of the model was also assessed on the test dataset. The  
440 probability that gives minimum mis-classification error was chosen as the cut-off. This process

441 was repeated 1000 times and the distribution of the resulting AUC and accuracy were  
442 demonstrated by a histogram with a density curve.  
443 Among 121 RV144 participants who became infected during the trial and had their HIV-1  
444 genome sequenced at diagnosis, 43 had GES measurements computed from microarray data  
445 (Fourati et al., 2019; Rolland et al., 2012). Vaccine and placebo groups were compared overall  
446 and after stratifying infections with single HIV-1 founders.

447

#### 448 **Other statistical analyses**

449 Logistic regression that accounted for the sampling design was used for the univariate analyses  
450 of the 63 enriched genes. A radar plot of the significant genes was generated to illustrate odds  
451 ratios (OR) and 95% confidence intervals. All ORs were reported per 1-SD increase. Significant  
452 genes resulted from univariate logistic regressions of the 63 enriched genes were further  
453 analyzed with a multivariate stepwise logistic regression to identify genes that independently  
454 associated with HIV protection. Akaike information criterion (AIC) was used to identify the  
455 optimal set of genes. The expressed enriched genes associated with higher magnitude of ADCP  
456 in RV306 at day 3 and 2 weeks post the RV144 vaccine regimen were used to compute the  
457 ADCP GES in RV144. Spearman correlation was calculated between the ADCP GES from the  
458 two timepoints and the infection GES respectively.

459 All descriptive and inferential statistical analyses were performed using GraphPad Prism  
460 8 (GraphPad Software) and R 3.6.1 (or later) software packages. Comparison of groups was  
461 performed using Mann-Whitney tests or t-tests when assumptions were met. All logistic  
462 regression models were adjusted for gender and baseline risk behavior and one significant  
463 principal component axis (Haynes et al., 2012; Prentice et al., 2015). A two-sided P value of less

464 than 0.05 was considered significant. The Benjamini and Hochberg method was used to calculate  
465 false discovery rate (FDR)-adjusted p values for multiple testing corrections.

466  
467 **Acknowledgements:** We would like to thank the volunteers and staff of the RV306, RV144 and  
468 HVTN 505 clinical trials. We also acknowledge DeAnna Tenney and Derrick Goodman, Duke  
469 University for expert technical assistance. The views expressed are those of the authors and  
470 should not be construed to represent the positions of the U.S. Army or the U.S. Department of  
471 Defense (DOD). This work was supported by a cooperative agreement (W81XWH-07-2-0067)  
472 between the Henry M. Jackson Foundation for the Advancement of Military Medicine, Inc., and  
473 the DOD. This research was funded in part by the U.S. National Institute of Allergy and  
474 Infectious Disease.

475 **References**

- 476 Ackerman, M. E., Das, J., Pittala, S., Broge, T., Linde, C., Suscovich, T. J., . . . Alter, G. (2018).  
477 Route of immunization defines multiple mechanisms of vaccine-mediated protection  
478 against SIV. *Nat Med*, 24(10), 1590-1598. doi:10.1038/s41591-018-0161-0
- 479 Ackerman, M. E., Moldt, B., Wyatt, R. T., Dugast, A. S., McAndrew, E., Tsoukas, S., . . . Alter,  
480 G. (2011). A robust, high-throughput assay to determine the phagocytic activity of  
481 clinical antibody samples. *J Immunol Methods*, 366(1-2), 8-19.  
482 doi:10.1016/j.jim.2010.12.016
- 483 Anderson, R. M., Swinton, J., & Garnett, G. P. (1995). Potential impact of low efficacy HIV-1  
484 vaccines in populations with high rates of infection. *Proc Biol Sci*, 261(1361), 147-151.  
485 doi:10.1098/rspb.1995.0129
- 486 Andersson, K. M., Owens, D. K., Vardas, E., Gray, G. E., McIntyre, J. A., & Paltiel, A. D.  
487 (2007). Predicting the impact of a partially effective HIV vaccine and subsequent risk  
488 behavior change on the heterosexual HIV epidemic in low- and middle-income countries:  
489 A South African example. *J Acquir Immune Defic Syndr*, 46(1), 78-90.  
490 doi:10.1097/QAI.0b013e31812506fd
- 491 Baden, L. R., Stieh, D. J., Sarnecki, M., Walsh, S. R., Tomaras, G. D., Kublin, J. G., . . .  
492 Traverse, H. H. P. X. S. T. (2020). Safety and immunogenicity of two heterologous HIV  
493 vaccine regimens in healthy, HIV-uninfected adults (TRAVERSE): a randomised,  
494 parallel-group, placebo-controlled, double-blind, phase 1/2a study. *Lancet HIV*, 7(10),  
495 e688-e698. doi:10.1016/S2352-3018(20)30229-0
- 496 Barouch, D. H., Alter, G., Broge, T., Linde, C., Ackerman, M. E., Brown, E. P., . . .  
497 Schuitemaker, H. (2015). Protective efficacy of adenovirus/protein vaccines against SIV

498 challenges in rhesus monkeys. *Science*, 349(6245), 320-324.  
499 doi:10.1126/science.aab3886

500 Barouch, D. H., Stephenson, K. E., Borducchi, E. N., Smith, K., Stanley, K., McNally, A. G., . . .  
501 Michael, N. L. (2013). Protective efficacy of a global HIV-1 mosaic vaccine against  
502 heterologous SHIV challenges in rhesus monkeys. *Cell*, 155(3), 531-539.  
503 doi:10.1016/j.cell.2013.09.061

504 Barouch, D. H., Tomaka, F. L., Wegmann, F., Stieh, D. J., Alter, G., Robb, M. L., . . .  
505 Schuitemaker, H. (2018). Evaluation of a mosaic HIV-1 vaccine in a multicentre,  
506 randomised, double-blind, placebo-controlled, phase 1/2a clinical trial (APPROACH)  
507 and in rhesus monkeys (NHP 13-19). *Lancet*, 392(10143), 232-243. doi:10.1016/S0140-  
508 6736(18)31364-3

509 Bradley, T., Pollara, J., Santra, S., Vandergrift, N., Pittala, S., Bailey-Kellogg, C., . . . Haynes, B.  
510 F. (2017). Pentavalent HIV-1 vaccine protects against simian-human immunodeficiency  
511 virus challenge. *Nat Commun*, 8, 15711. doi:10.1038/ncomms15711

512 Breslow, N. E., & Holubkov, R. (1997). Weighted likelihood, pseudo-likelihood and maximum  
513 likelihood methods for logistic regression analysis of two-stage data. *Stat Med*, 16(1-3),  
514 103-116. doi:10.1002/(sici)1097-0258(19970115)16:1<103::aid-sim474>3.0.co;2-p

515 Chung, A. W., & Alter, G. (2017). Systems serology: profiling vaccine induced humoral  
516 immunity against HIV. *Retrovirology*, 14(1), 57. doi:10.1186/s12977-017-0380-3

517 Ehrenberg, P. K., Shangguan, S., Issac, B., Alter, G., Geretz, A., Izumi, T., . . . Thomas, R.  
518 (2019). A vaccine-induced gene expression signature correlates with protection against  
519 SIV and HIV in multiple trials. *Sci Transl Med*, 11(507).  
520 doi:10.1126/scitranslmed.aaw4236



- 521 Fauci, A. S. (2017). An HIV Vaccine Is Essential for Ending the HIV/AIDS Pandemic. *JAMA*,  
522 318(16), 1535-1536. doi:10.1001/jama.2017.13505
- 523 Fong, Y., Shen, X., Ashley, V. C., Deal, A., Seaton, K. E., Yu, C., . . . Tomaras, G. D. (2018).  
524 Modification of the Association Between T-Cell Immune Responses and Human  
525 Immunodeficiency Virus Type 1 Infection Risk by Vaccine-Induced Antibody Responses  
526 in the HVTN 505 Trial. *J Infect Dis*, 217(8), 1280-1288. doi:10.1093/infdis/jiy008
- 527 Fourati, S., Ribeiro, S. P., Blasco Tavares Pereira Lopes, F., Talla, A., Lefebvre, F., Cameron,  
528 M., . . . Sekaly, R. P. (2019). Integrated systems approach defines the antiviral pathways  
529 conferring protection by the RV144 HIV vaccine. *Nat Commun*, 10(1), 863.  
530 doi:10.1038/s41467-019-08854-2
- 531 Geraghty, D. E., Thorball, C. W., Fellay, J., & Thomas, R. (2019). Effect of Fc Receptor Genetic  
532 Diversity on HIV-1 Disease Pathogenesis. *Front Immunol*, 10, 970.  
533 doi:10.3389/fimmu.2019.00970
- 534 Gorini, G., Fourati, S., Vaccari, M., Rahman, M. A., Gordon, S. N., Brown, D. R., . . . Franchini,  
535 G. (2020). Engagement of monocytes, NK cells, and CD4+ Th1 cells by ALVAC-SIV  
536 vaccination results in a decreased risk of SIVmac251 vaginal acquisition. *PLoS Pathog*,  
537 16(3), e1008377. doi:10.1371/journal.ppat.1008377
- 538 Hammer, S. M., Sobieszczyk, M. E., Janes, H., Karuna, S. T., Mulligan, M. J., Grove, D., . . .  
539 Gilbert, P. B. (2013). Efficacy trial of a DNA/rAd5 HIV-1 preventive vaccine. *The New*  
540 *England journal of medicine*, 369(22), 2083-2092. doi:10.1056/NEJMoa1310566
- 541 Haynes, B. F., Gilbert, P. B., McElrath, M. J., Zolla-Pazner, S., Tomaras, G. D., Alam, S. M., . . .  
542 Kim, J. H. (2012). Immune-correlates analysis of an HIV-1 vaccine efficacy trial. *The*  
543 *New England journal of medicine*, 366(14), 1275-1286. doi:10.1056/NEJMoa1113425

- 544 Hsu, D. C., & O'Connell, R. J. (2017). Progress in HIV vaccine development. *Hum Vaccin*  
545 *Immunother*, 13(5), 1018-1030. doi:10.1080/21645515.2016.1276138
- 546 Janes, H. E., Cohen, K. W., Frahm, N., De Rosa, S. C., Sanchez, B., Hural, J., . . . McElrath, M.  
547 J. (2017). Higher T-Cell Responses Induced by DNA/rAd5 HIV-1 Preventive Vaccine  
548 Are Associated With Lower HIV-1 Infection Risk in an Efficacy Trial. *J Infect Dis*,  
549 215(9), 1376-1385. doi:10.1093/infdis/jix086
- 550 Kotliarov, Y., Sparks, R., Martins, A. J., Mule, M. P., Lu, Y., Goswami, M., . . . Tsang, J. S.  
551 (2020). Broad immune activation underlies shared set point signatures for vaccine  
552 responsiveness in healthy individuals and disease activity in patients with lupus. *Nat*  
553 *Med*. doi:10.1038/s41591-020-0769-8
- 554 Li, S., Roupheal, N., Duraisingham, S., Romero-Steiner, S., Presnell, S., Davis, C., . . .  
555 Pulendran, B. (2014). Molecular signatures of antibody responses derived from a systems  
556 biology study of five human vaccines. *Nat Immunol*, 15(2), 195-204. doi:10.1038/ni.2789
- 557 Medlock, J., Pandey, A., Parpia, A. S., Tang, A., Skrip, L. A., & Galvani, A. P. (2017).  
558 Effectiveness of UNAIDS targets and HIV vaccination across 127 countries. *Proc Natl*  
559 *Acad Sci U S A*, 114(15), 4017-4022. doi:10.1073/pnas.1620788114
- 560 Mega, E. R. (2019). 'Mosaic' HIV vaccine to be tested in thousands of people across the world.  
561 *Nature*, 572(7768), 165-166. doi:10.1038/d41586-019-02319-8
- 562 Nakaya, H. I., Wrammert, J., Lee, E. K., Racioppi, L., Marie-Kunze, S., Haining, W. N., . . .  
563 Pulendran, B. (2011). Systems biology of vaccination for seasonal influenza in humans.  
564 *Nat Immunol*, 12(8), 786-795. doi:10.1038/ni.2067

- 565 Neidich, S. D., Fong, Y., Li, S. S., Geraghty, D. E., Williamson, B. D., Young, W. C., . . .  
566 Tomaras, G. D. (2019). Antibody Fc effector functions and IgG3 associate with  
567 decreased HIV-1 risk. *J Clin Invest*, 129(11), 4838-4849. doi:10.1172/JCI126391
- 568 NIH. (2020). NIH news release. Experimental HIV Vaccine Regimen Ineffective in Preventing  
569 HIV. National Institutes of Health Web Site (2020). [https://www.nih.gov/news-](https://www.nih.gov/news-events/news-releases/experimental-hiv-vaccine-regimen-ineffective-preventing-hiv)  
570 [events/news-releases/experimental-hiv-vaccine-regimen-ineffective-preventing-hiv](https://www.nih.gov/news-events/news-releases/experimental-hiv-vaccine-regimen-ineffective-preventing-hiv)  
571 [Press release]
- 572 Picelli, S., Faridani, O. R., Bjorklund, A. K., Winberg, G., Sagasser, S., & Sandberg, R. (2014).  
573 Full-length RNA-seq from single cells using Smart-seq2. *Nat Protoc*, 9(1), 171-181.  
574 doi:10.1038/nprot.2014.006
- 575 Pitisuttithum, P., Nitayaphan, S., Charialertsak, S., Kaewkungwal, J., Dawson, P., Dhitavat, J., .  
576 . . group, R. V. s. (2020). Late boosting of the RV144 regimen with AIDSVAX B/E and  
577 ALVAC-HIV in HIV-uninfected Thai volunteers: a double-blind, randomised controlled  
578 trial. *Lancet HIV*, 7(4), e238-e248. doi:10.1016/S2352-3018(19)30406-0
- 579 Prentice, H. A., Tomaras, G. D., Geraghty, D. E., Apps, R., Fong, Y., Ehrenberg, P. K., . . .  
580 Thomas, R. (2015). HLA class II genes modulate vaccine-induced antibody responses to  
581 affect HIV-1 acquisition. *Sci Transl Med*, 7(296), 296ra112.  
582 doi:10.1126/scitranslmed.aab4005
- 583 Ramskold, D., Luo, S., Wang, Y. C., Li, R., Deng, Q., Faridani, O. R., . . . Sandberg, R. (2012).  
584 Full-length mRNA-Seq from single-cell levels of RNA and individual circulating tumor  
585 cells. *Nat Biotechnol*, 30(8), 777-782. doi:10.1038/nbt.2282
- 586 Rerks-Ngarm, S., Pitisuttithum, P., Nitayaphan, S., Kaewkungwal, J., Chiu, J., Paris, R., . . .  
587 Kim, J. H. (2009). Vaccination with ALVAC and AIDSVAX to prevent HIV-1 infection

588 in Thailand. *The New England journal of medicine*, 361(23), 2209-2220.  
589 doi:10.1056/NEJMoa0908492

590 Rolland, M., Edlefsen, P. T., Larsen, B. B., Tovanabutra, S., Sanders-Buell, E., Hertz, T., . . .  
591 Kim, J. H. (2012). Increased HIV-1 vaccine efficacy against viruses with genetic  
592 signatures in Env V2. *Nature*, 490(7420), 417-420. doi:10.1038/nature11519

593 Stoeckius, M., Hafemeister, C., Stephenson, W., Houck-Loomis, B., Chattopadhyay, P. K.,  
594 Swerdlow, H., . . . Smibert, P. (2017). Simultaneous epitope and transcriptome  
595 measurement in single cells. *Nat Methods*, 14(9), 865-868. doi:10.1038/nmeth.4380

596 Stoeckius, M., Zheng, S., Houck-Loomis, B., Hao, S., Yeung, B. Z., Mauck, W. M., 3rd, . . .  
597 Satija, R. (2018). Cell Hashing with barcoded antibodies enables multiplexing and  
598 doublet detection for single cell genomics. *Genome Biol*, 19(1), 224. doi:10.1186/s13059-  
599 018-1603-1

600 Stuart, T., Butler, A., Hoffman, P., Hafemeister, C., Papalexi, E., Mauck, W. M., 3rd, . . . Satija,  
601 R. (2019). Comprehensive Integration of Single-Cell Data. *Cell*, 177(7), 1888-1902  
602 e1821. doi:10.1016/j.cell.2019.05.031

603 Subramanian, A., Tamayo, P., Mootha, V. K., Mukherjee, S., Ebert, B. L., Gillette, M. A., . . .  
604 Mesirov, J. P. (2005). Gene set enrichment analysis: a knowledge-based approach for  
605 interpreting genome-wide expression profiles. *Proc Natl Acad Sci U S A*, 102(43), 15545-  
606 15550. doi:10.1073/pnas.0506580102

607 Tay, M. Z., Kunz, E. L., Deal, A., Zhang, L., Seaton, K. E., Rountree, W., . . . Permar, S. R.  
608 (2019). Rare Detection of Antiviral Functions of Polyclonal IgA Isolated from Plasma  
609 and Breast Milk Compartments in Women Chronically Infected with HIV-1. *J Virol*,  
610 93(7). doi:10.1128/JVI.02084-18

- 611 Tay, M. Z., Liu, P., Williams, L. D., McRaven, M. D., Sawant, S., Gurley, T. C., . . . Tomaras,  
612 G. D. (2016). Antibody-Mediated Internalization of Infectious HIV-1 Virions Differs  
613 among Antibody Isotypes and Subclasses. *PLoS Pathog*, *12*(8), e1005817.  
614 doi:10.1371/journal.ppat.1005817
- 615 Tay, M. Z., Wiehe, K., & Pollara, J. (2019). Antibody-Dependent Cellular Phagocytosis in  
616 Antiviral Immune Responses. *Front Immunol*, *10*, 332. doi:10.3389/fimmu.2019.00332
- 617 Vaccari, M., Fourati, S., Gordon, S. N., Brown, D. R., Bissa, M., Schifanella, L., . . . Franchini,  
618 G. (2018). HIV vaccine candidate activation of hypoxia and the inflammasome in  
619 CD14(+) monocytes is associated with a decreased risk of SIVmac251 acquisition. *Nat*  
620 *Med*, *24*(6), 847-856. doi:10.1038/s41591-018-0025-7
- 621 Vaccari, M., Gordon, S. N., Fourati, S., Schifanella, L., Liyanage, N. P., Cameron, M., . . .  
622 Franchini, G. (2016). Adjuvant-dependent innate and adaptive immune signatures of risk  
623 of SIVmac251 acquisition. *Nat Med*, *22*(7), 762-770. doi:10.1038/nm.4105
- 624 van Furth, R., Cohn, Z. A., Hirsch, J. G., Humphrey, J. H., Spector, W. G., & Langevoort, H. L.  
625 (1972). The mononuclear phagocyte system: a new classification of macrophages,  
626 monocytes, and their precursor cells. *Bull World Health Organ*, *46*(6), 845-852.  
627 Retrieved from <https://www.ncbi.nlm.nih.gov/pubmed/4538544>
- 628 Zhou, Y., Zhou, B., Pache, L., Chang, M., Khodabakhshi, A. H., Tanaseichuk, O., . . . Chanda, S.  
629 K. (2019). Metascape provides a biologist-oriented resource for the analysis of systems-  
630 level datasets. *Nat Commun*, *10*(1), 1523. doi:10.1038/s41467-019-09234-6
- 631
- 632

633 **Figure Legends**

634 **Fig. 1. Composite gene expression scores (GES) are higher in the uninfected compared to**  
635 **infected groups.** GES computed from enriched genes in the geneset is higher in the uninfected  
636 compared to infected vaccinated NHP and humans. (A) Ad26/gp140 (09-11 NHP SIV challenge  
637 study, 58 enriched genes, N = 10), (B) Ad26/gp140 (13-19 NHP SHIV challenge study, 58  
638 enriched genes, N = 11), (C) Ad26/Ad26+gp140 (13-19 NHP SHIV challenge study, 68 enriched  
639 genes, N = 12), and (D) ALVAC/gp 120 (RV144 human efficacy trial, 63 enriched genes, N =  
640 170). The statistical significance was calculated by either Mann-Whitney or unpaired t-test.

641  
642 **Fig. 2. GES is a stronger correlate of reduced risk of infection in RV144.** A GES of the 63  
643 enriched genes in the RV144 study was examined as a continuous variable (N = 170). (A) GES is  
644 associated with lower odds of HIV acquisition compared to the other two primary correlates of  
645 risk. Variables were measured at week 26, two weeks post last vaccination. For each variable, the  
646 odds ratio is reported per 1-SD increase. Transcriptome data was available only in a subset of the  
647 246 donors. (B) Probability of acquiring HIV-1 is lower in individuals with higher GES. (C)  
648 Vaccine efficacy is increased significantly in individuals with high GES. (D) Distribution of AUC  
649 and accuracy plotted after repeating the process 1000 times showed that GES could predict HIV-  
650 1 infection with AUC of  $0.67 \pm 0.08$  and with accuracy of  $0.83 \pm 0.02$ .

651  
652 **Fig. 3. Strong relationship between functional ADCP responses in a human vaccine trial and**  
653 **the protective RV144 signature.** The geneset that associated with protection in an efficacy study  
654 was also enriched with higher magnitude of ADCP measured two weeks after vaccination in an  
655 immunogenicity trial that employed the RV144 vaccine regimen. NES from RNA-seq data at

656 timepoints (A) 2 weeks (118 enriched genes) (N = 24) and (B) 3 days (93 enriched genes) (N =  
657 21) post the RV144 vaccine regimen in the RV306 trial are indicated. (C) GES computed from the  
658 enriched genes associating with ADCP correlated strongly with the protective GES in the RV144  
659 study (N =170).

660

661 **Fig. 4. Pathway analyses of the enriched genes in the different vaccine studies.** A meta-analysis  
662 of pathways including enriched genes with reduced infection or higher ADCP was performed. (A)  
663 The top related pathways and their (B) corresponding significance are indicated for the RV144  
664 infection (N = 172), 09-11 (infection & ADCP) (N = 10), two arms of 13-19 (infection & ADCP)  
665 (N = 23), and RV306 ADCP (2 timepoints) (N = 45) enriched genes. Each term is represented by  
666 a circle node, where its size is proportional to the number of input genes that fall into that term,  
667 and its color represents its cluster identity. Terms with a similarity score > 0.3 are linked by an  
668 edge (the thickness of the edge represents the similarity score). The network is visualized with  
669 Cytoscape (v3.1.2) with “force-directed” layout and with edge bundled for clarity. (C) Clustering  
670 of the 63 enriched genes that associated with reduced infection in the RV144 study.

671

672 **Fig. 5. Cellular origin of the RV144 signature.** Single cell CITE-seq in vaccinated participants  
673 (N = 12) that employed the RV144 vaccine regimen (day 3 after last vaccination) identified  
674 expression of the genes in the signature in cells from the myeloid lineage. (A) Clustering based on  
675 cell surface expression of CITE-seq data (B) Heat map of the mRNA expression of the 63 genes  
676 from the RV144 signature from single cells. Columns represent single cells from different protein  
677 cell subsets and rows the mRNA gene expression (C) Radar plot showing significant genes in the  
678 signature that associated with decreased risk of infection in RV144 (P<0.05, q<0.1) (N =170). (D)

679 Feature plots of the expression of the most protective genes show that SEMA4A, IL17RA, CTSD,  
680 CD68 and GAA were mainly expressed in monocytes. (E) CD14<sup>+</sup> monocytes had the highest  
681 number of differentially expressed genes (DEG) when comparing high versus low ADCP (2 weeks  
682 after vaccination) from single cell CITE-seq vaccinated participants that employed the RV144  
683 vaccine regimen (day 3 after last vaccination).

684

### 685 **Supplementary Material**

686 **Supplementary Fig. 1. Association of the GES with HIV-1 breakthrough infections in a**  
687 **human vaccine trial.** GES was significantly higher in the placebo (blue) compared to vaccine  
688 recipients (red) among the RV144 participants with single-founder breakthrough infection  
689 ( $P < 0.05$ ). Numbers indicate the number of participants plotted. Asterisks indicate significant  
690 pairwise differences by Mann-Whitney test.

691

692 **Supplementary table 1.** Number of enriched genes from the geneset in different comparisons  
693 from multiple studies.



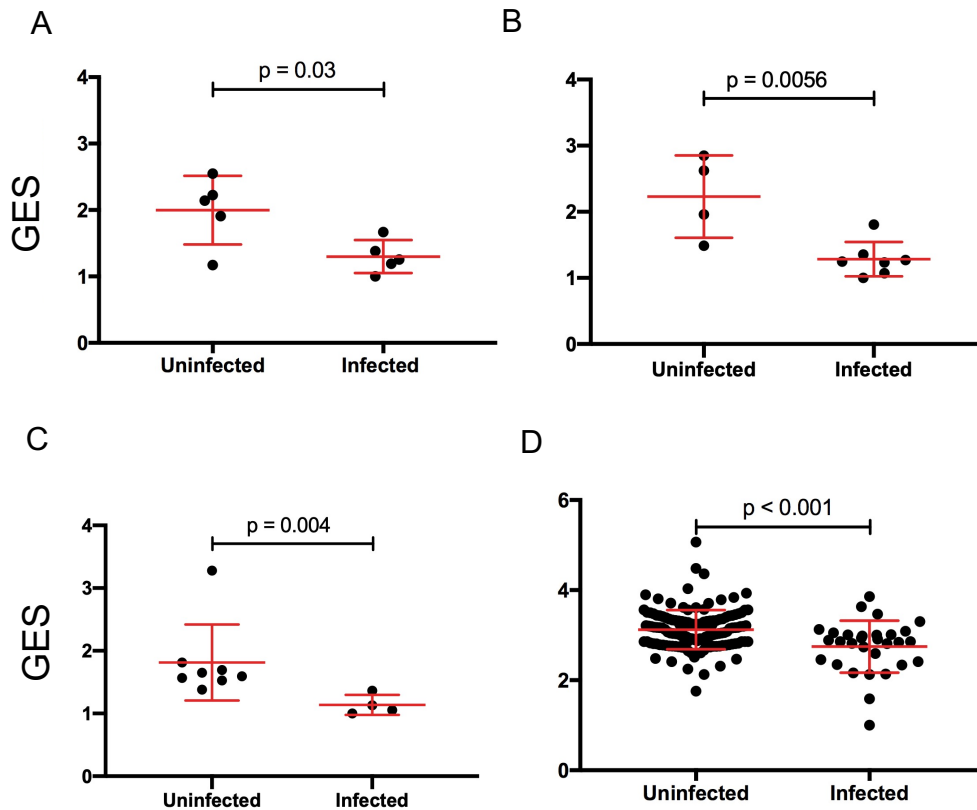

**Fig. 1. Composite gene expression scores (GES) are higher in the uninfected compared to infected groups.** GES computed from enriched genes in the geneset is higher in the uninfected compared to infected vaccinated NHP and humans. (A) Ad26/gp140 (09-11 NHP SIV challenge study, 58 enriched genes, N = 10), (B) Ad26/gp140 (13-19 NHP SHIV challenge study, 58 enriched genes, N = 11), (C) Ad26/Ad26+gp140 (13-19 NHP SHIV challenge study, 68 enriched genes, N = 12), and (D) ALVAC/gp120 (RV144 human efficacy trial, 63 enriched genes, N = 170). The statistical significance was calculated by either Mann-Whitney or unpaired t-test.

A

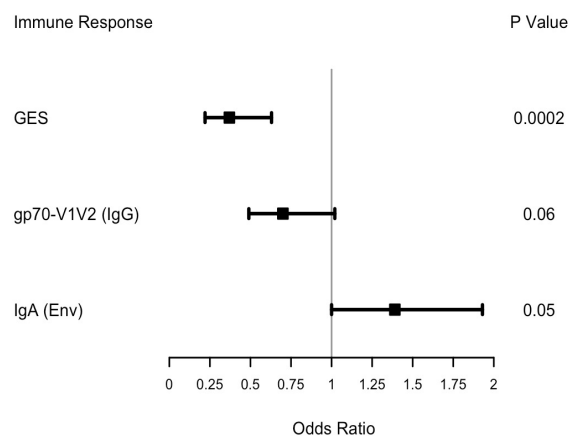

B

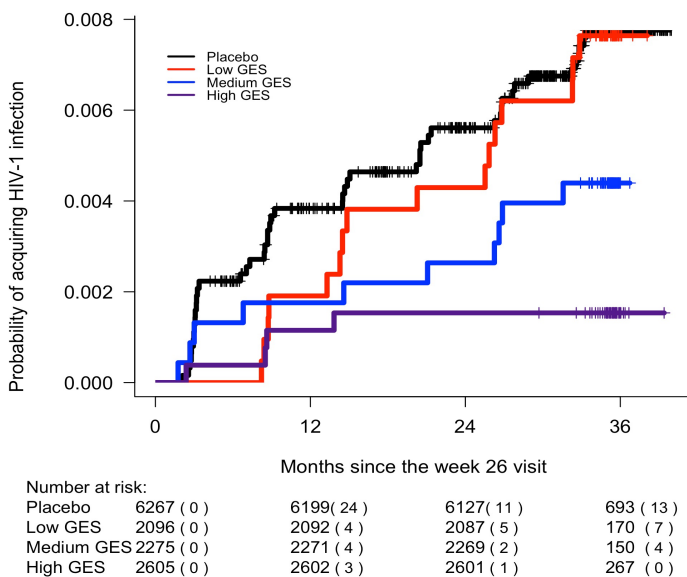

C

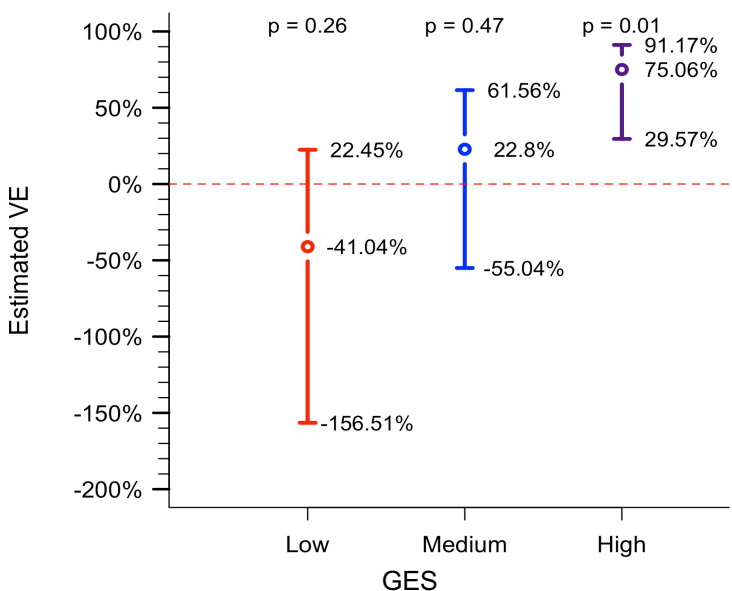

D

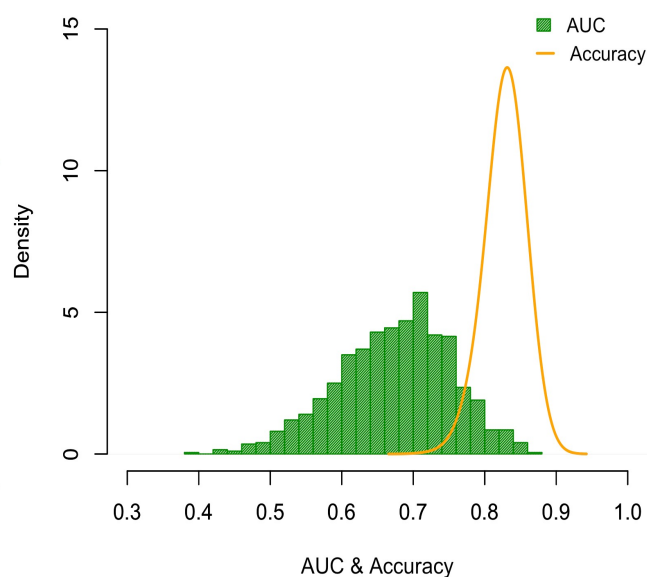

**Fig. 2. GES is a stronger correlate of reduced risk of infection in RV144.** A GES of the 63 enriched genes in the RV144 study was examined as a continuous variable (N = 170). (A) GES is associated with lower odds of HIV acquisition compared to the other two primary correlates of risk. Variables were measured at week 26, two weeks post last vaccination. For each variable, the odds ratio is reported per 1-SD increase.

Transcriptome data was available only in a subset of the 246 donors. (B) Probability of acquiring HIV-1 is lower in individuals with higher GES. (C) Vaccine efficacy is increased significantly in individuals with high GES. (D) Distribution of AUC and accuracy plotted after repeating the process 1000 times showed that GES could predict HIV-1 infection with AUC of  $0.67 \pm 0.08$  and with accuracy of  $0.83 \pm 0.02$ .

A

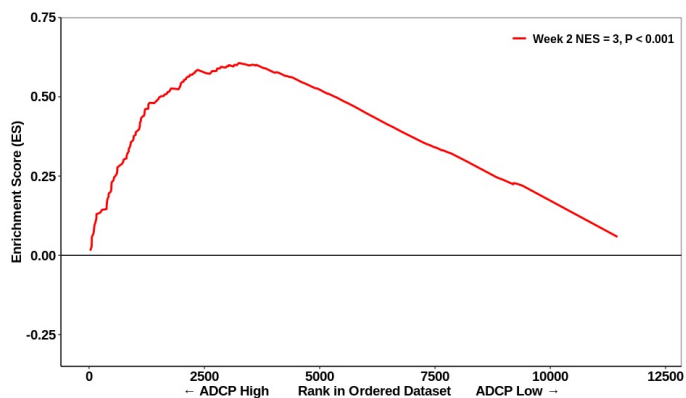

B

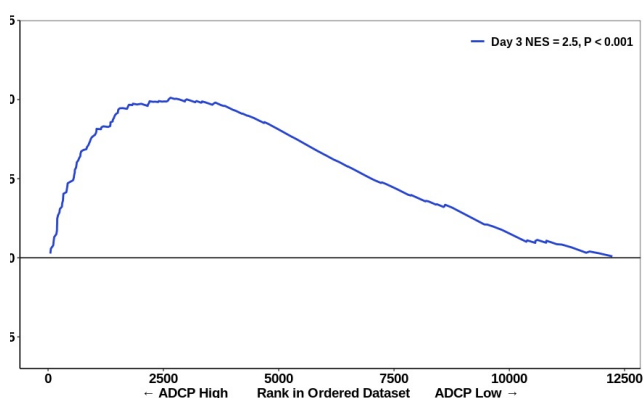

C

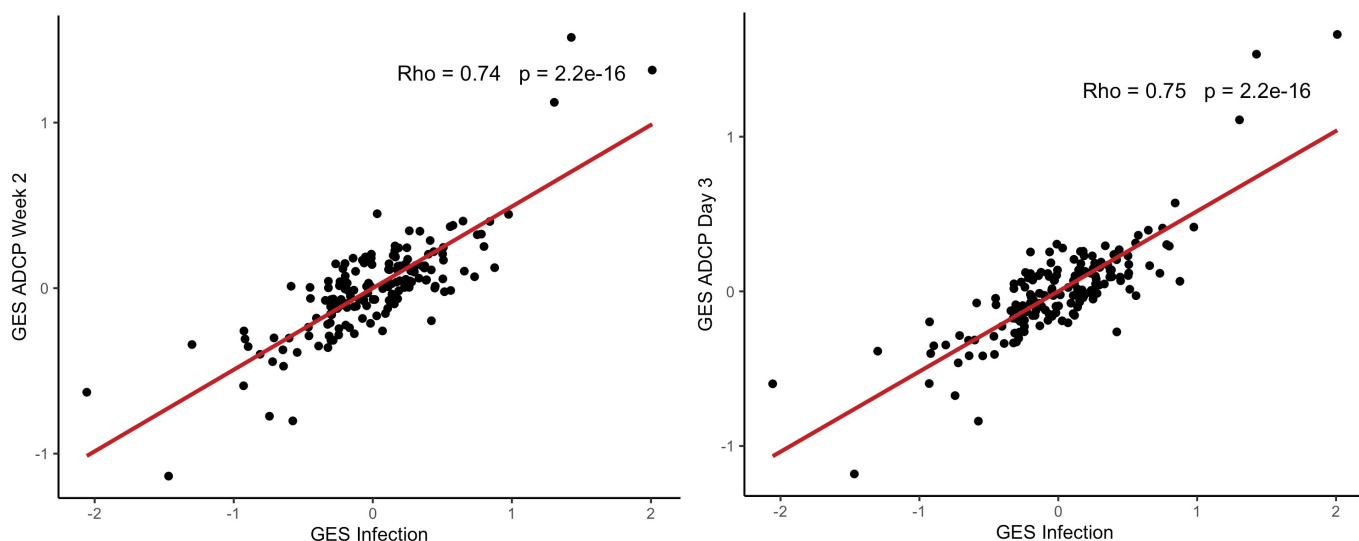

**Fig. 3. Strong relationship between functional ADCP responses in a human vaccine trial and the protective RV144 signature.** The geneset that associated with protection in an efficacy study was also enriched with higher magnitude of ADCP measured two weeks after vaccination in an immunogenicity trial that employed the RV144 vaccine regimen. NES from RNA-seq data at timepoints (A) 2 weeks (118 enriched genes) ( $N = 24$ ) and (B) 3 days (93 enriched genes) ( $N = 21$ ) post the RV144 vaccine regimen in the RV306 trial are indicated. (C) GES computed from the enriched genes associating with ADCP correlated strongly with the protective GES in the RV144 study ( $N = 170$ ).

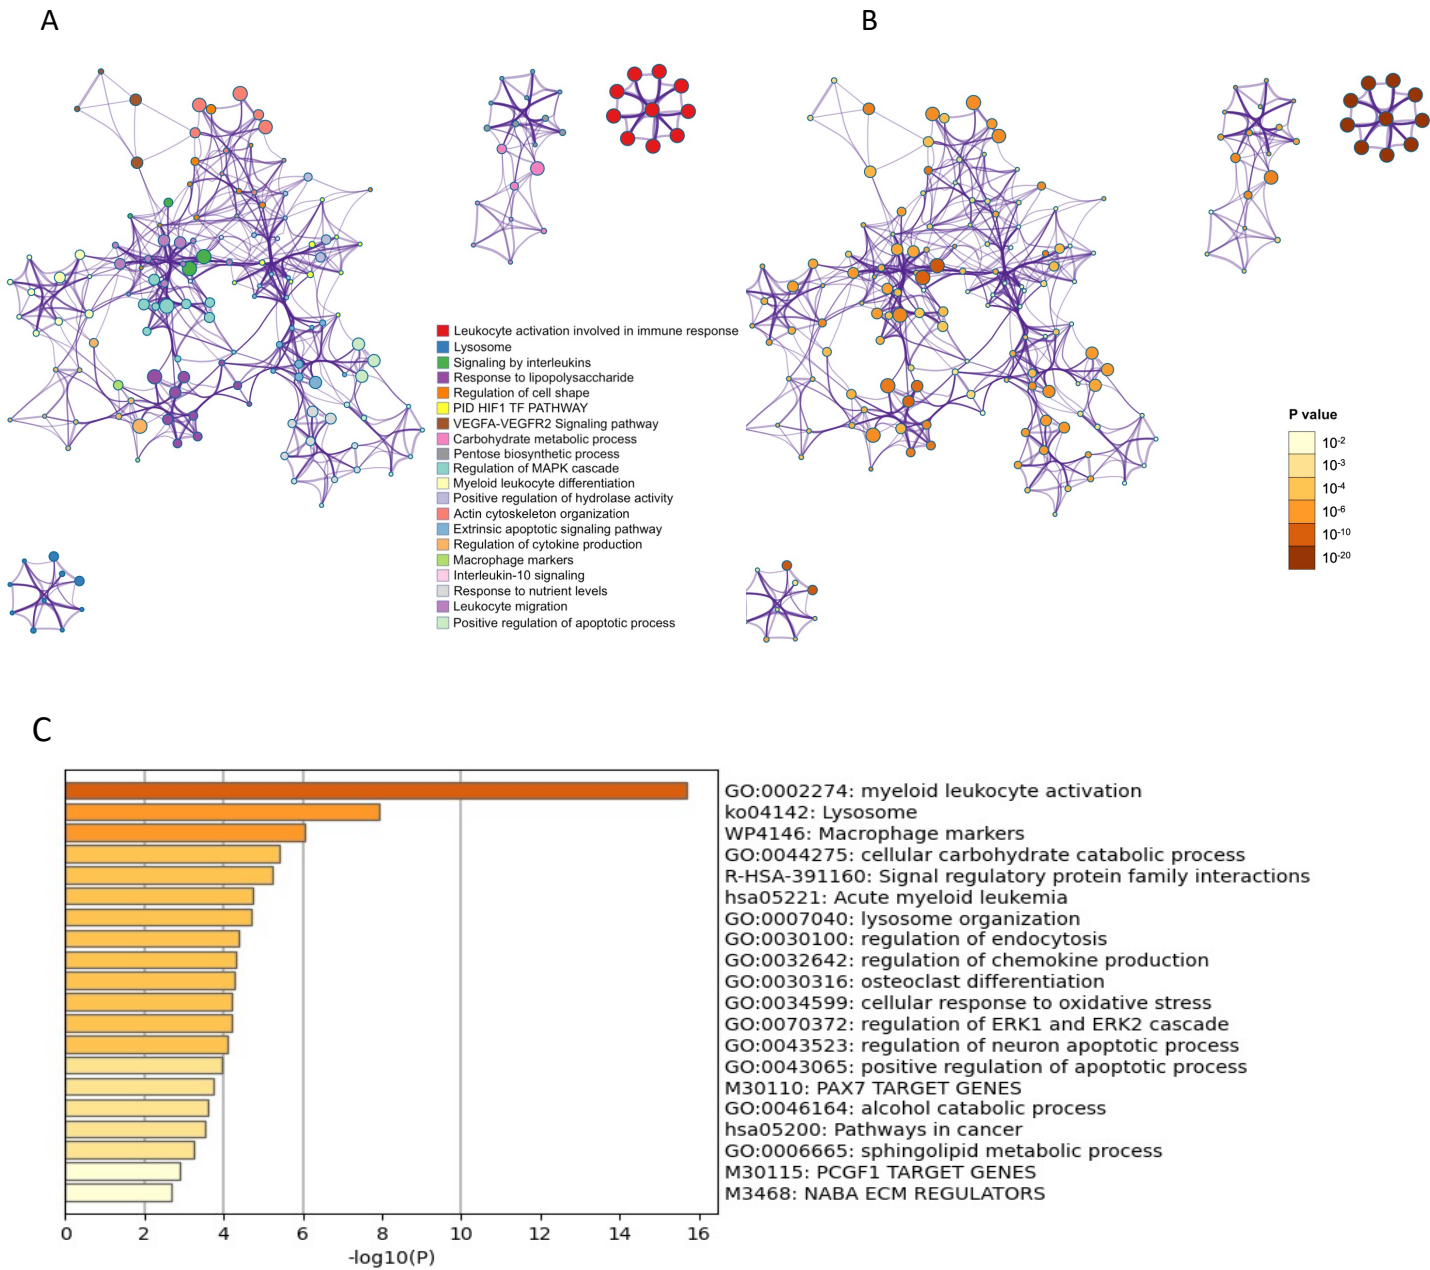

**Fig. 4. Pathway analyses of the enriched genes in the different vaccine studies.** A meta-analysis of pathways including enriched genes with reduced infection or higher ADCP was performed. (A) The top related pathways and their (B) corresponding significance are indicated for the RV144 infection (N = 172), 09-11 (infection & ADCP) (N = 10), two arms of 13-19 (infection & ADCP) (N = 23), and RV306 ADCP (2 timepoints) (N = 45) enriched genes. Each term is represented by a circle node, where its size is proportional to the number of input genes that fall into that term, and its color represents its cluster identity. Terms with a similarity score > 0.3 are linked by an edge (the thickness of the edge represents the similarity score). The network is visualized with Cytoscape (v3.1.2) with “force-directed” layout and with edge bundled for clarity. (C) Clustering of the 63 enriched genes that associated with reduced infection in the RV144 study.

A

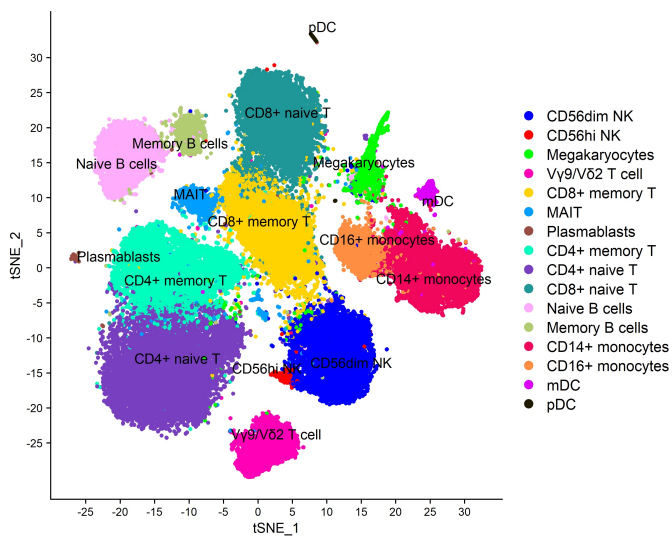

B

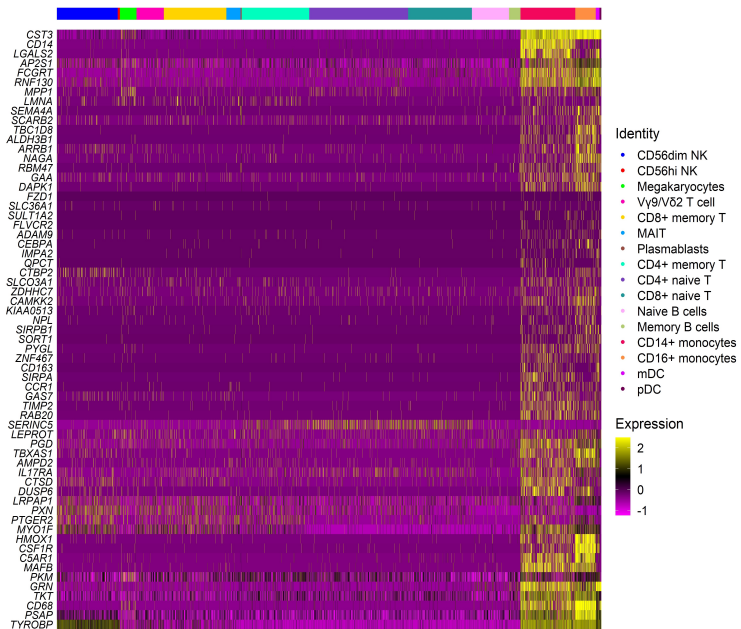

C

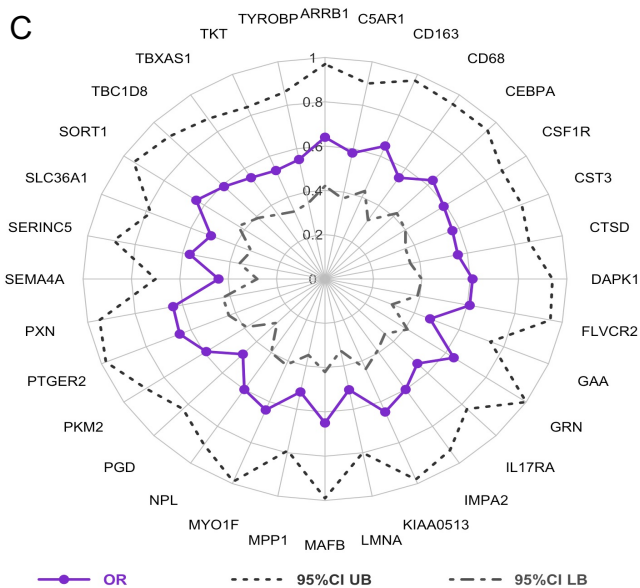

D

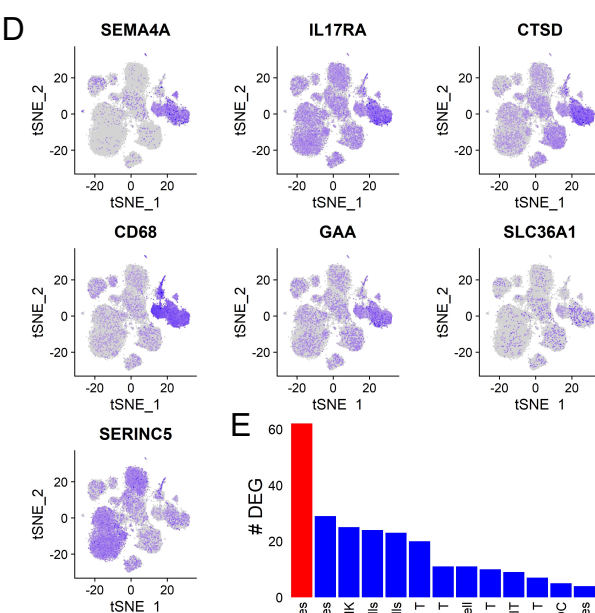

E

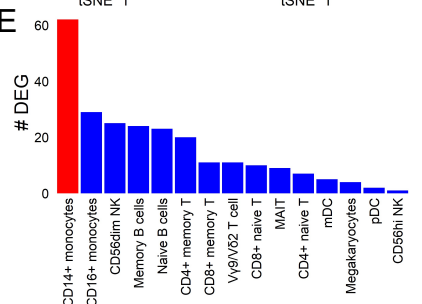

**Fig. 5. Cellular origin of the RV144 signature.** Single cell CITE-seq in vaccinated participants (N = 12) that

employed the RV144 vaccine regimen (day 3 after last vaccination) identified expression of the genes in the

signature in cells from the myeloid lineage. (A) Clustering based on cell surface expression of CITE-seq data

(B) Heat map of the mRNA expression of the 63 genes from the RV144 signature from single cells. Columns

represent single cells from different protein cell subsets and rows the mRNA gene expression (C) Radar plot

showing significant genes in the signature that associated with decreased risk of infection in RV144 ( $P < 0.05$ ,

$q < 0.1$ ) (N = 170). (D) Feature plots of the expression of the most protective genes show that SEMA4A,

IL17RA, CTSD, CD68 and GAA were mainly expressed in monocytes. (E) CD14+ monocytes had the highest

number of differentially expressed genes (DEG) when comparing high versus low ADCP (2 weeks after

vaccination) from single cell CITE-seq vaccinated participants that employed the RV144 vaccine regimen (day

3 after last vaccination).

Table 1. Gene signature associates with vaccine protection in multiple trials.

| Study    | Vaccine Regimen     | Species | Partial protection | N   | Method     | Protective signature |
|----------|---------------------|---------|--------------------|-----|------------|----------------------|
| 09-11    | Ad26/gp140          | NHP     | Y                  | 10  | RNA-seq    | Y                    |
| 13-19    | Ad26/gp140          | NHP     | Y                  | 11  | RNA-seq    | Y                    |
| 13-19    | A26/Ad26 +gp140     | NHP     | Y                  | 12  | RNA-seq    | Y                    |
| 13-19    | Ad26/MVA+gp140      | NHP     | Y                  | 9   | RNA-seq    | N                    |
|          | ALVAC-SIV/gp120     | NHP     | Y                  | 27  | Microarray | Y                    |
|          | DNA-SIV/ALVAC+gp120 | NHP     | Y                  | 12  | Microarray | Y                    |
| RV144    | ALVAC/gp120         | Human   | Y                  | 170 | Microarray | Y                    |
| HVTN 505 | DNA/rAd5            | Human   | N                  | 42  | RNA-seq    | N                    |

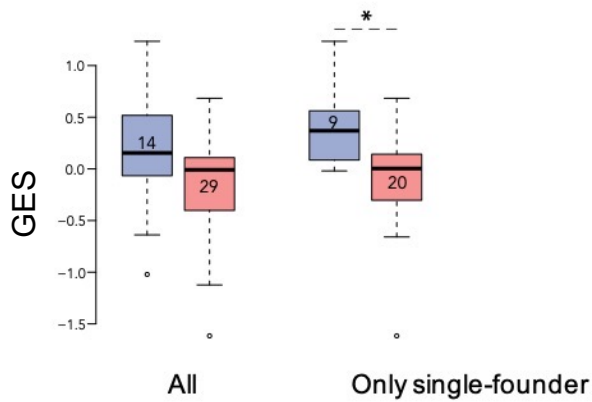

**Supplementary Fig. 1. Association of the GES with HIV-1 breakthrough infections in a human vaccine trial.** GES was significantly higher in the placebo (blue) compared to vaccine recipients (red) among the RV144 participants with single-founder breakthrough infection ( $P < 0.05$ ). Numbers indicate the number of participants plotted. Asterisk indicate significant pairwise differences by Mann-Whitney test.
